# Supplementary material for: History of Kakioka Magnetic Observatory
Source: Copernicus journal article supplement (doi:10.5194/hgss-2022-5), 2022-04-22
Supplement: Supplementary file [file hgss-2022-5-AC2-supplement.pdf]

Response to comments from Reviewer 2 (Dr. Adrian Hitchman)

We appreciate Reviewer 2's comments and support to our work. We are also very grateful to her careful reading of the text written in a poor English. We basically accept her suggestions about the language. Our responses are given below.

*While I am unable to record in detail the numerous minor edits that would polish the text, I do recommend the following more significant amendments:*

*In different places in the text, replace*

1. *“manned” with “staffed” and “unmanned” with “unstaffed” to use gender neutral text where possible*
2. *“head quarter” and “headquarter” with “headquarters”*
3. *“cupper” with “copper”*
4. *“alternative current” with “alternating current”*

Replacement was done as suggested.

*page 1, line 3: does the Meteorological College postcode have some numbers missing?  
– “270-????”*

As the reviewer suspected, the postcode of Meteorological College's address was missing. It was completed as 277-0852.

*p 1, l 25: correct the spelling of “Kanoya”*

It was corrected as 'Kanoya'.

*p 2, l 9: replace “war load” with “warlord”*

It was corrected as suggested.

*p 8, l 1: replace “dart-covered” with “dirt-covered” (I think)*

The reviewer is correct. The mistake was corrected.

*p 18, l 6: replace “Verlin” with “Berlin”*

It was corrected as suggested.

*p 22, l 8: replace “consigned” with “assigned”*

It was corrected as suggested.

*p 26, l 4: replace “electorode” with “electrode”*

It was corrected as suggested.

*p 31, l 10: replace “function” with “operate”*

It was changed as suggested.

*p 45, l 1: change the Section number from “8” to “9”, and then add 1 to all later Section number*

Thank you for spotting this embarrassing mistake. The section is numbered correctly now.

*p 54, l 1: “booming economy” is more commonly used (although “blooming economy” works too)*

We use ‘booming economy’.

*p 57, l 2: replace “island” with “Island”*

It was corrected as suggested.
